# Supplementary material for: ApoE Genotype-Dependent Response to Antioxidant and Exercise Interventions on Brain Function
Source: PubMed Central journal article supplement (PMC7346214; doi:10.3390/antiox9060553), 2020-06-25
Supplement: antioxidants-09-00553-s001.pdf [file antioxidants-09-00553-s001.pdf]

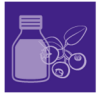

Supplementary Figures

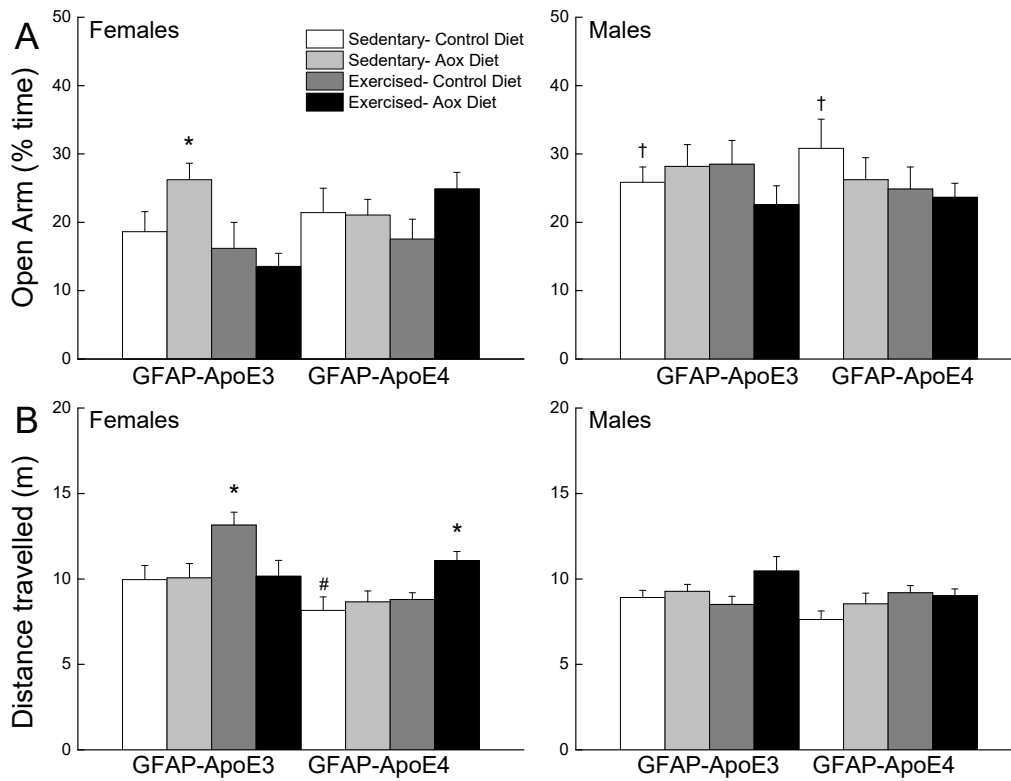

**Figure S1.** Effect of exercise and antioxidant on performance on the elevated plus maze in male and female GFAP-ApoE3 and GFAP-ApoE4 mice. Each value represents mean  $\pm$  SEM,  $n = 8-16$ . \*  $p < 0.05$  vs. sex- and strain-matched Sed-Con groups; #  $p < 0.05$  comparing sex-matched Sed-Con GFAP-ApoE3 and GFAP-ApoE4; †  $p < 0.05$  comparing strain-matched Sed-Con males and females.

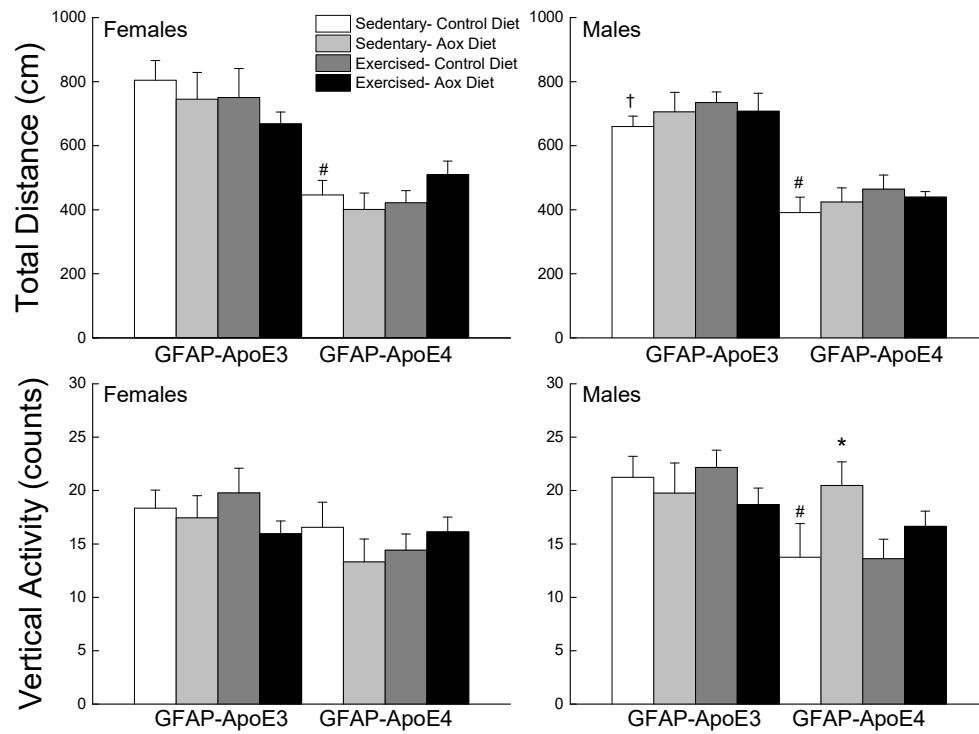

**Figure S2.** Effect of exercise and antioxidant on spontaneous activity in male and female GFAP-ApoE3 and GFAP-ApoE4 mice. Each value represents mean  $\pm$  SEM,  $n = 8-16$ . \*  $p < 0.05$  vs. sex- and strain-matched Sed-Con groups; #  $p < 0.05$  comparing sex-matched Sed-Con GFAP-ApoE3 and GFAP-ApoE4.

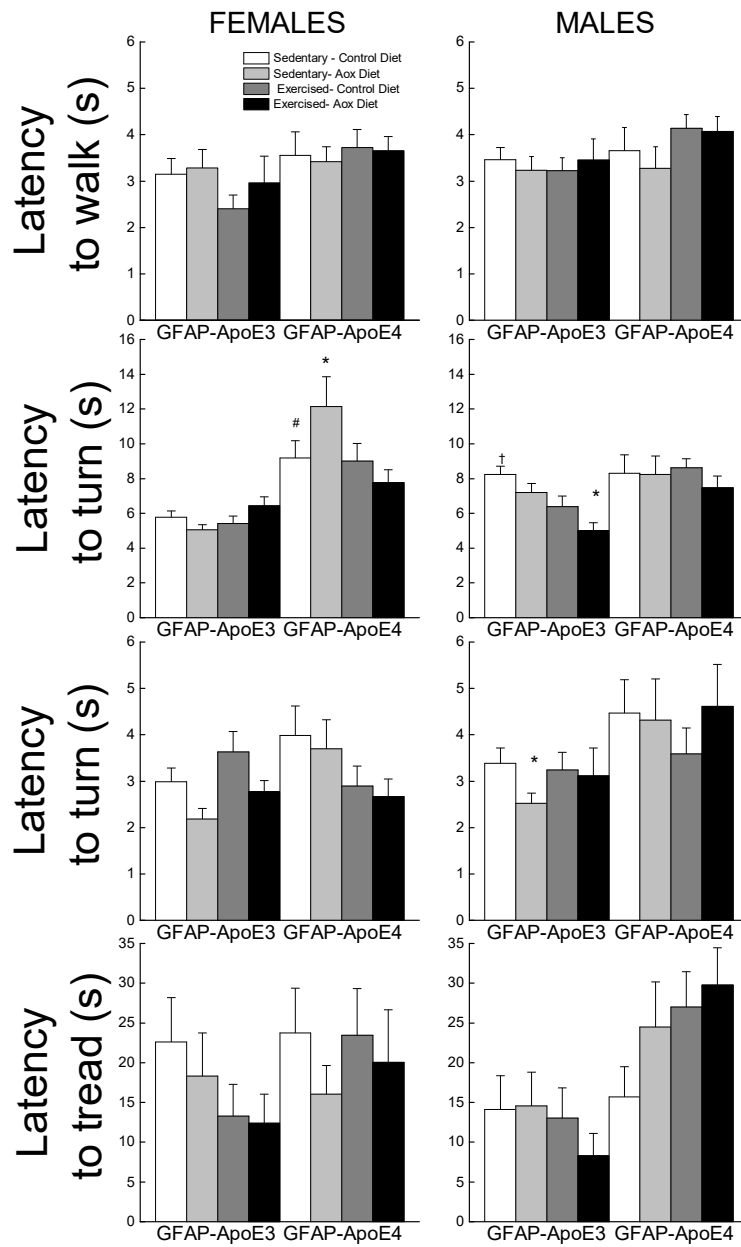

**Figure S3.** Effect of exercise and antioxidant on reflexes in male and female GFAP-ApoE3 and GFAP-ApoE4 mice. Each value represents mean  $\pm$  SEM,  $n = 8-16$ . \*  $p < 0.05$  vs. sex- and strain-matched Sed-Con groups; #  $p < 0.05$  comparing sex-matched Sed-Con GFAP-ApoE3 and GFAP-ApoE4; †  $p < 0.05$  comparing strain-matched Sed-Con males and females.

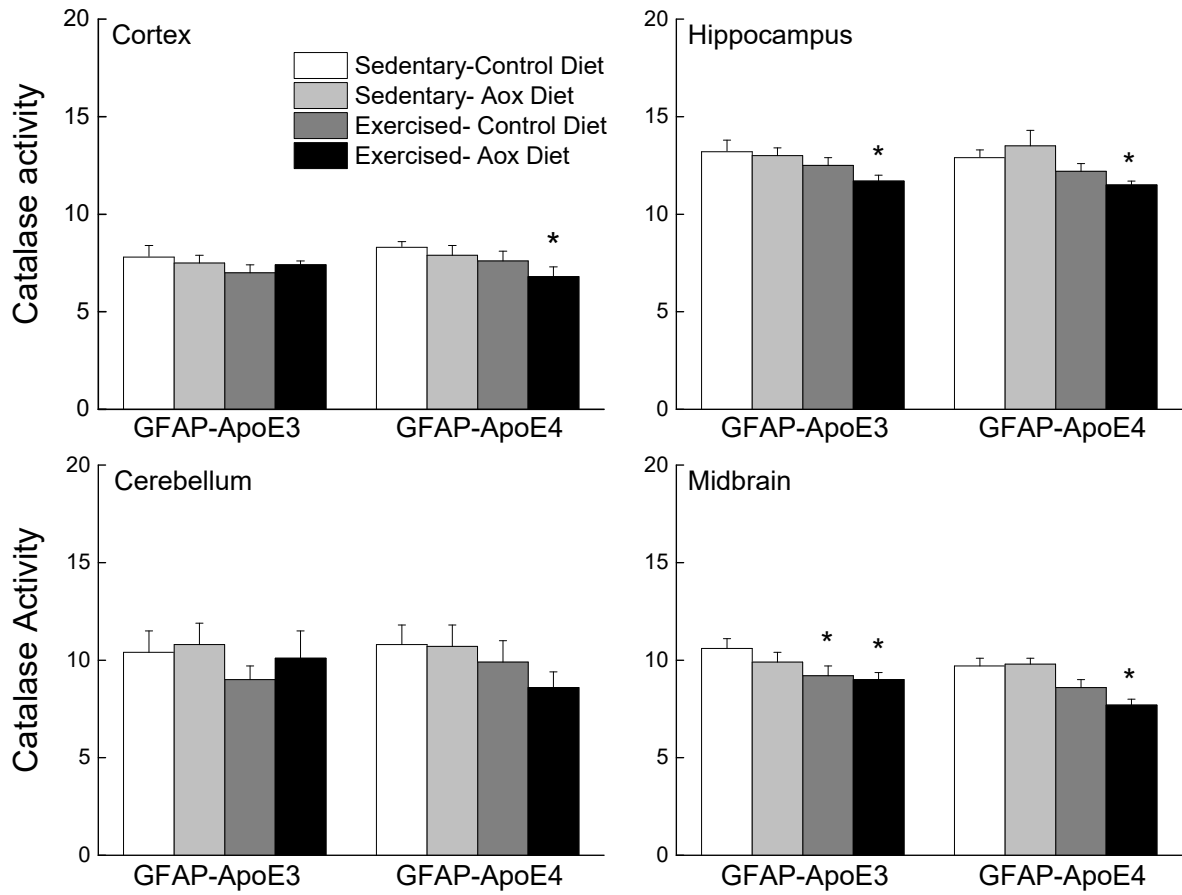

**Figure S4.** Effect of exercise and antioxidant on catalase activity from different brain regions from GFAP-ApoE3 and GFAP-ApoE4 mice. Each value represents mean  $\pm$  SEM,  $n = 8-16$ . \*  $p < 0.05$  vs. sex- and strain-matched Sed-Con groups.
